# Supplementary material
Source: PubMed Central journal article supplement (PMC9069129)
Supplement: mmc1.pdf [file mmc1.pdf]

**The American Journal of Human Genetics, Volume 109**

**Supplemental information**

**Duplications disrupt chromatin architecture  
and rewire *GPR101*-enhancer communication  
in X-linked acrogigantism**

**Martin Franke, Adrian F. Daly, Leonor Palmeira, Amit Tirosh, Antonio Stigliano, Eszter Trifan, Fabio R. Faucz, Dayana Abboud, Patrick Petrossians, Juan J. Tena, Eleonora Vitali, Andrea G. Lania, José L. Gómez-Skarmeta, Albert Beckers, Constantine A. Stratakis, and Giampaolo Trivellin**

## Supplemental Information

### Supplemental Figures

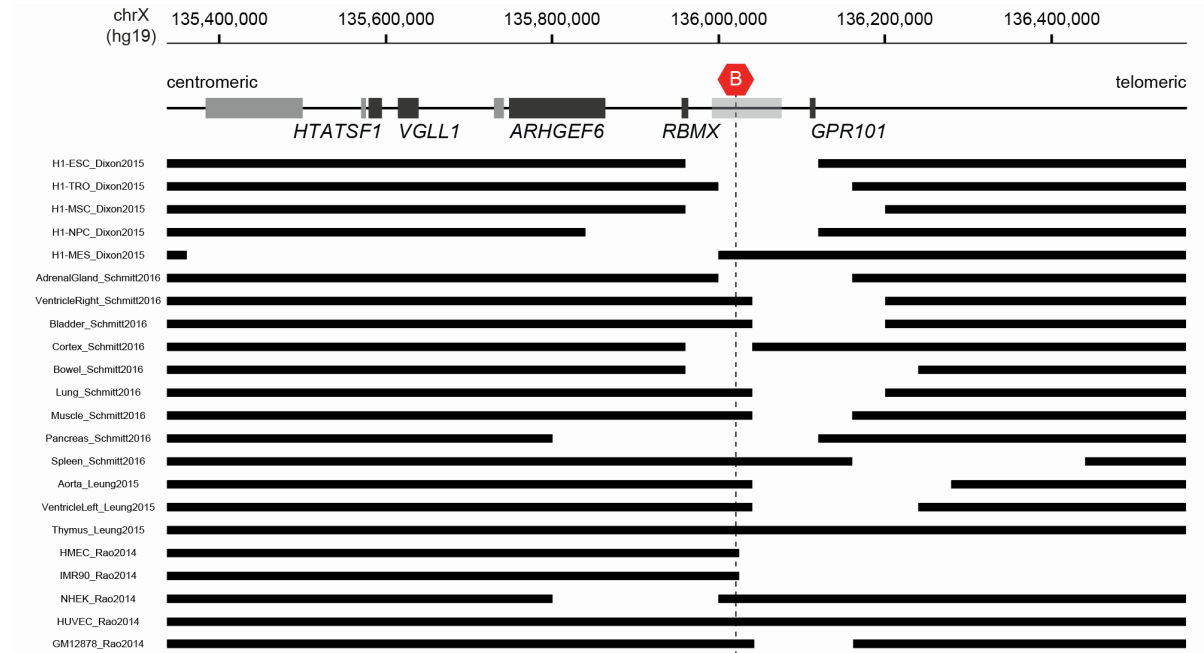

**Figure S1. A tissue invariant TAD border separates *GPR101* from further centromeric genomic sequences at the X-LAG locus**

TAD position (black bars) in 22 different human primary tissues and cell lines (Table S3). Predicted TAD positions are based on Hi-C data at 40 kb resolution and retrieved from the 3D genome browser.<sup>1</sup> Note that the TAD border (gap between TADs) separating *GPR101* from the centromeric genes is present in most analyzed tissues and cells. Although not computationally predicted in HUVEC cells and thymus, visual inspection of Hi-C data confirms the TAD border position between *RBMX* and *GPR101*.

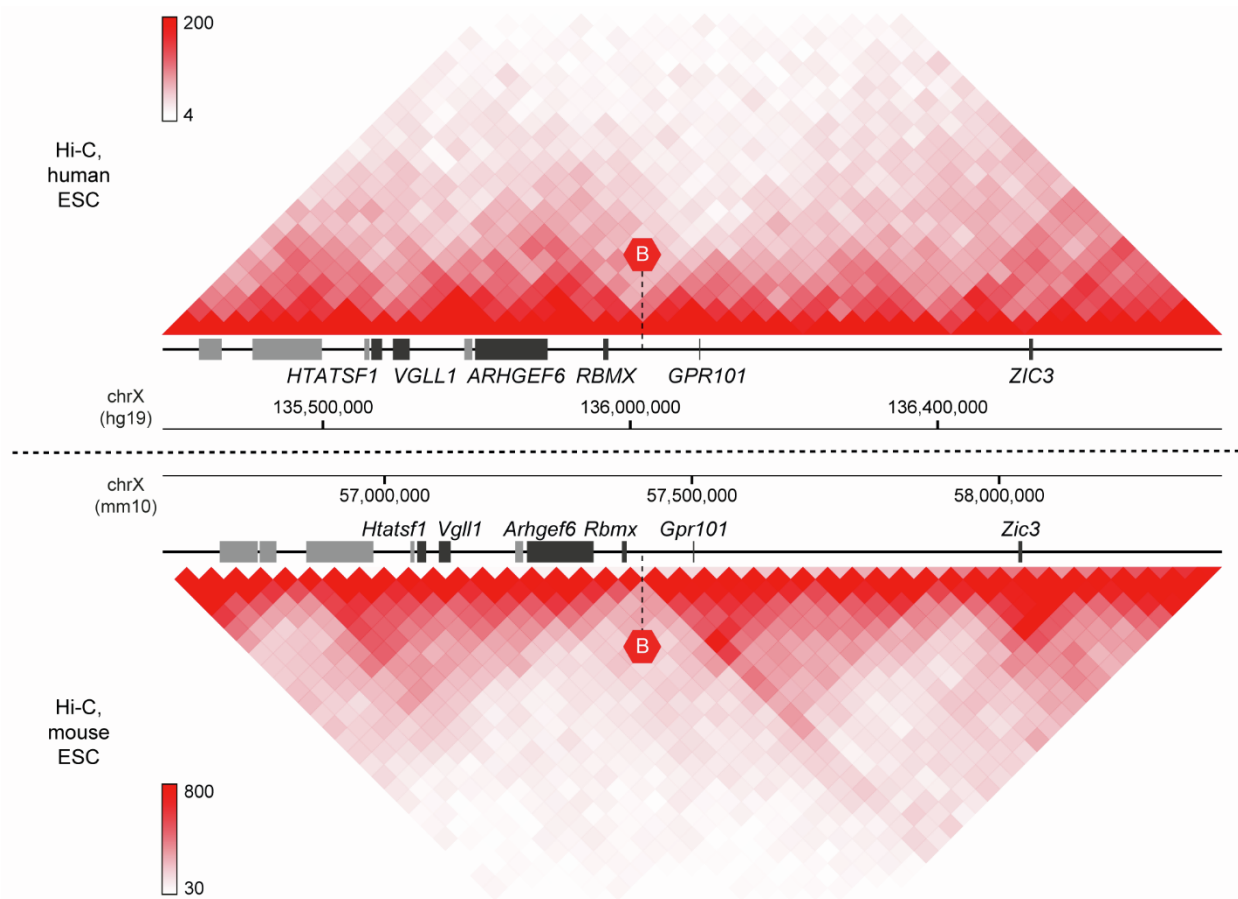

**Figure S2. Conserved synteny and chromatin structure around the X-LAG locus between human and mouse**

Hi-C data at 40 kb resolution from human H1-ES cells (top, NCBI Gene Expression Omnibus (GEO) GSE52457)<sup>2</sup> and mouse ES cells (bottom, GEO GSE96107),<sup>3</sup> visualized in the 3D genome browser.<sup>1</sup> Displayed genomic regions (human, hg19, chrX:135,240,000-136,960,000 and mouse, mm10, chrX:56,640,000-58,360,000) are centered at *GPR101*/*Gpr101*.

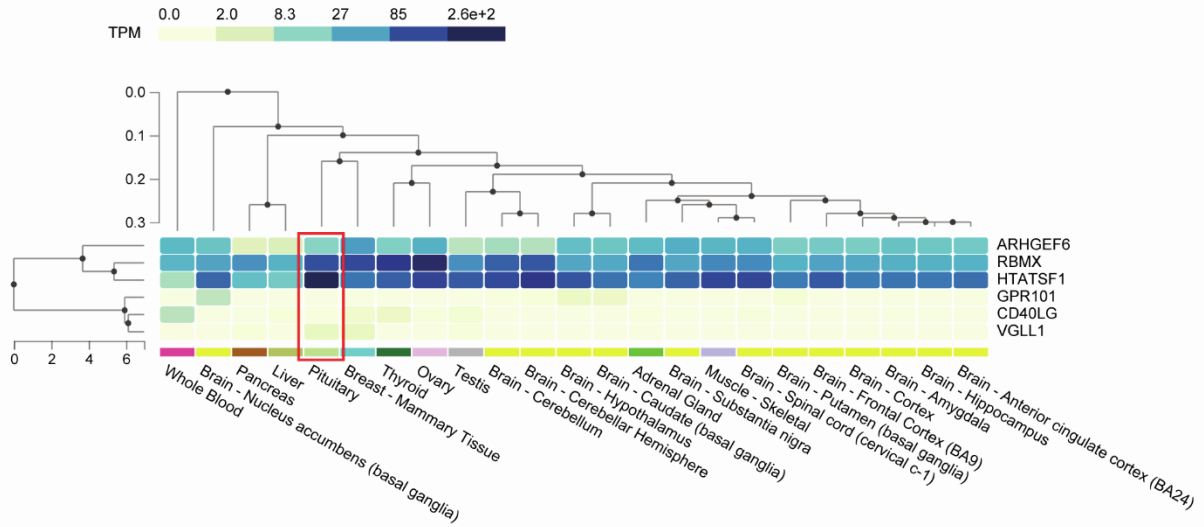

### Figure S3. Gene expression patterns at the X-LAG locus

Expression data, gene and tissue clustering were obtained from the GTEx Portal, using the GTEx Multi Gene Query.<sup>4</sup> *ARHGEF6*, *RBMX*, and *HTATSF1* are broadly expressed, with strong expression in the pituitary. In contrast, *GPR101*, *CD40LG*, and *VGLL1* show restricted expression patterns. Note the pituitary expression (red square) of *CD40LG* (0.1 TPM) and *VGLL1* (1.1 TPM), but not of *GPR101*. Median TPM (Transcripts Per Million) are displayed.

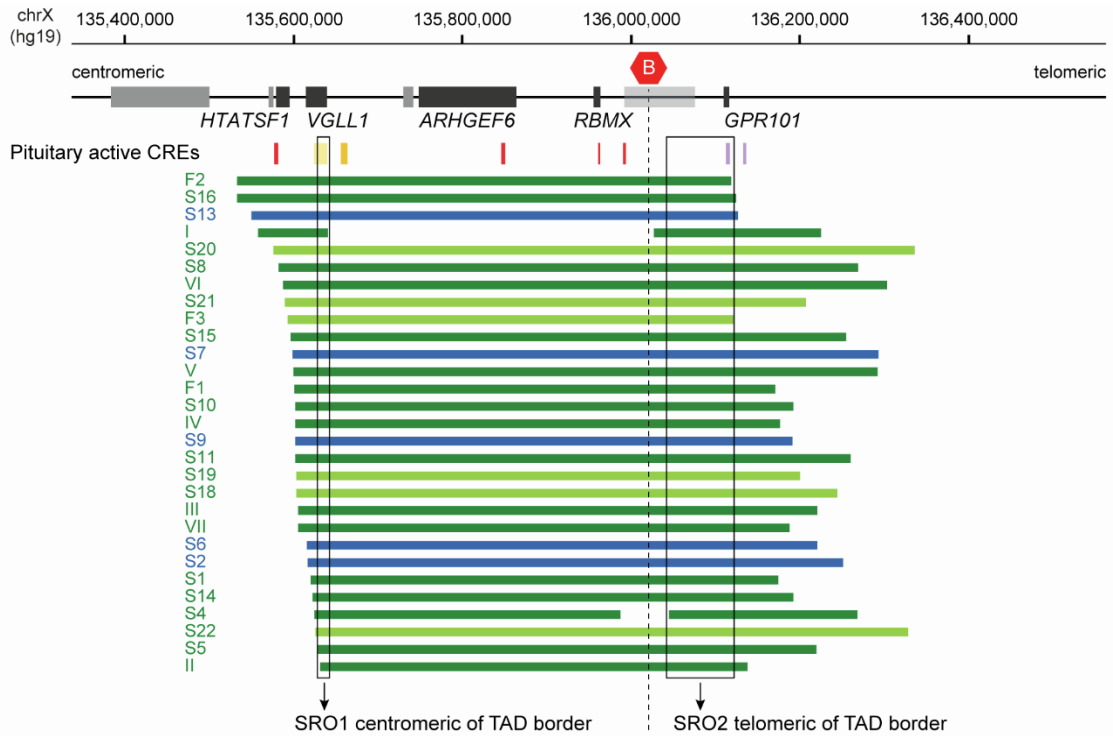

**Figure S4. Smallest regions of overlap (SROs) of X-LAG duplications overlap with candidate pituitary enhancers and *GPR101* promoter elements**

Genomic position of pituitary active CREs (related to Figure 5A) and published duplications at the X-LAG locus (blue and green). All duplications include genomic regions around *GPR101* and centromeric to the TAD border. SROs (black squares) at the telomeric and centromeric side of the TAD border include *GPR101* and candidate pituitary enhancers (yellow boxes) within *VGLL1*, respectively. Note that, although the duplications reported in subjects *I* and *S4* are interrupted, the rearrangements at the duplication breakpoint favor proximity of *GPR101* and candidate pituitary enhancers. In blue, duplications used for 4C-seq analysis in this study. We herein defined as *S18* and *S19* the two females reported in *Trivellin et al.*,<sup>5</sup> *S20* the female described in *Liang et al.*,<sup>6</sup> and *S21* and *S22* the two females described in *Trarbach et al.*<sup>7</sup> Note that the duplication breakpoints for individuals *F3*, *S18*, *S19*, *S20*, *S21*, and *S22* (light green) are approximate, as only determined by array CGH.

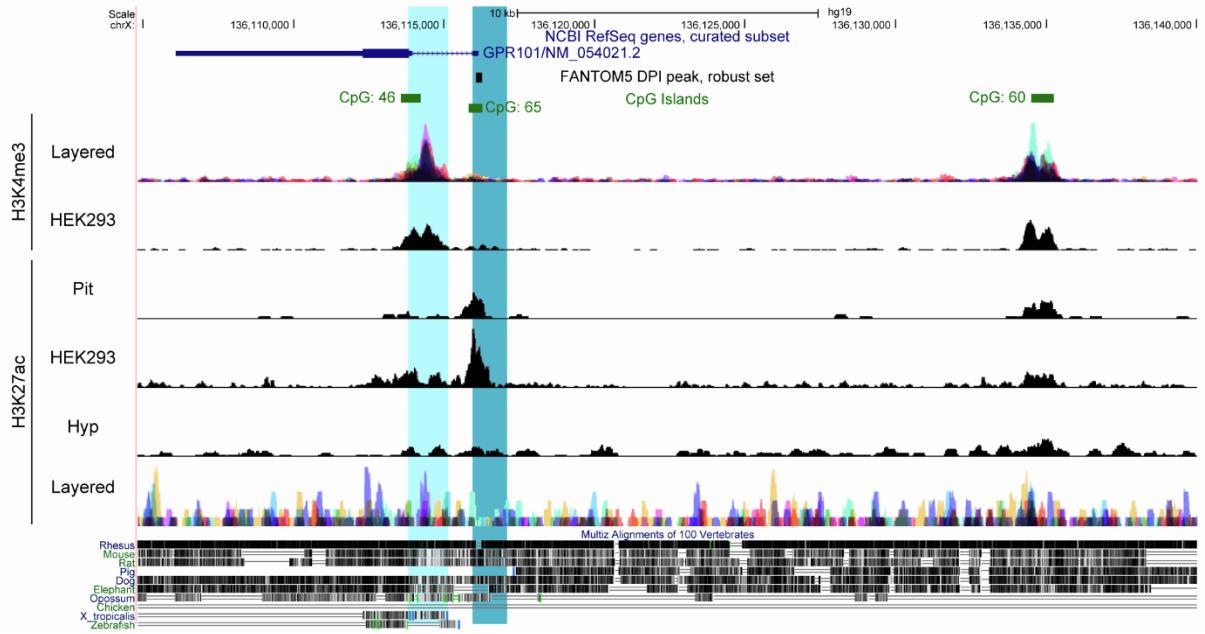

**Figure S5. Location and biochemical features of the two CREs located upstream of *GPR101***

The proximal promoter sequence (light blue shading) overlaps with a CpG island (green bar) spanning *GPR101* start codon, and it includes most of the 5'UTR of isoform 1 previously described.<sup>8</sup> It is also marked by H3K4me3 - a promoter-specific histone modification - in several cell types, including HEK293. The distal promoter sequence (dark blue shading) spans the non-coding exon 1 of isoform 2,<sup>8</sup> as well as another CpG island and CAGE-seq defined TSS.<sup>9</sup> It also overlaps with the H3K27ac histone enhancer mark, specifically in the pituitary and in HEK293 cells (GEO GSE81696).<sup>10</sup> Note also the location of the far distal putative *GPR101* promoter on the right side of the figure. The pituitary (Pit) and hypothalamus (Hyp) H3K27ac ChIP-seq tracks were retrieved from GEO GSM1119175 and GSM1119152, respectively.<sup>11</sup> Layered H3K27ac, layered H3K4me3, and H3K4me3 in HEK293 cells tracks were retrieved from the ENCODE consortium.<sup>12</sup>

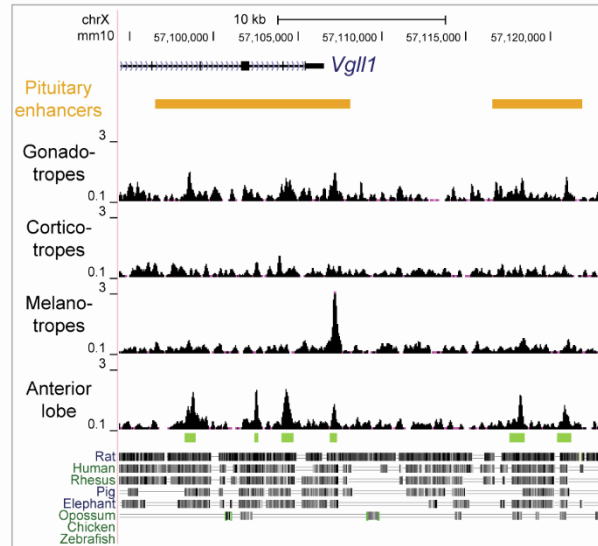

**Figure S6. Sequence and functional conservation of candidate pituitary-specific enhancers in mouse pituitary cells**

Equivalent position of candidate human pituitary enhancer (yellow boxes) in the mouse genome (mm10). ATAC-seq tracks from purified mouse gonadotropes, corticotropes, and melanotrope cells and anterior lobe pituitary cells (mostly composed of Pit1-dependent somatotropes and lactotropes but excluding gonadotropes) retrieved from NCBI GEO GSM3579920, GSM2324083, GSM2324084, and GSM3579919, respectively.<sup>13</sup> Note that enriched open chromatin regions (indicated by green boxes) in anterior lobe cells overlap with candidate pituitary enhancers identified in the human pituitary.

## Supplemental Tables

**Table S1. Summary of details of X-LAG individuals studied by 4C-seq and RNA-seq**

| <b>X-LAG<br/>subject code</b> | <b>Sex</b> | <b>Age at disease<br/>onset (months)</b> | <b>Tumor<br/>classification</b> | <b>Technique</b> | <b>Reference</b> |
|-------------------------------|------------|------------------------------------------|---------------------------------|------------------|------------------|
| S2                            | Female     | 12                                       | Macroadenoma                    | 4C-seq           | 14; 15           |
| S4                            | Female     | 2                                        | Macroadenoma                    | RNA-seq          | 14; 15           |
| S6                            | Female     | 6                                        | Macroadenoma                    | 4C-seq, RNA-seq  | 14; 15           |
| S7                            | Female     | 36                                       | Macroadenoma                    | 4C-seq           | 14; 15           |
| S9                            | Female     | 3                                        | Macroadenoma                    | 4C-seq           | 14; 15           |
| S11                           | Male       | 48                                       | Macroadenoma                    | RNA-seq          | 14; 15           |
| S13                           | Female     | 48                                       | Macroadenoma                    | 4C-seq, RNA-seq  | 14; 15           |
| S17                           | Female     | 12                                       | Macroadenoma                    | 4C-seq           | na               |

na: not available.



**Table S2. Primers used in this study**

| Viewpoint                                                                                                                                                          | Read Primer 1 (5'-3')                   | Primer 2 (5'-3')                         | Ref. Genome | RE (1 <sup>st</sup> / 2 <sup>nd</sup> ) | Fragend coordinates                                                 |
|--------------------------------------------------------------------------------------------------------------------------------------------------------------------|-----------------------------------------|------------------------------------------|-------------|-----------------------------------------|---------------------------------------------------------------------|
| <i>GPR101</i>                                                                                                                                                      | TCTTTCTCCCCCTCTCTCT                     | TTTCTGACTCTCTCCACCAC                     | hg19        | Csp6I/<br>DpnII                         | chrX:136115379-<br>136116771                                        |
| <i>RBMX</i>                                                                                                                                                        | GCTTAAGAACAGCTAAGGGTGA                  | AGTCCTAACACGGGGAGA                       | hg19        | DpnII/<br>Csp6I                         | chrX:135961852-<br>135962755                                        |
| <i>VGLL1</i>                                                                                                                                                       | CAGGGAGTTGCTTGTGAG                      | CATATCAGTGCCTGGCTTAT                     | hg19        | DpnII/<br>Csp6I                         | chrX:135614980-<br>135615359                                        |
| <i>Breakpoint<br/>for patient S6</i>                                                                                                                               | ACAGTAGGTGTTCTGTAAACTGC                 | TGAGTCTATTTCTGGCCTCTC                    | hg19        | Csp6I/<br>DpnII                         | unique fragend<br>around breakpoint<br>chrX:135615580-<br>136220614 |
| 4C-seq primer sequences for inverse PCR and digestion strategy for 4C library preparation. Fragend coordinates for viewpoint (first to second restriction enzyme). |                                         |                                          |             |                                         |                                                                     |
| CRE                                                                                                                                                                | Forward Primer (5'-3')                  | Reverse Primer (5'-3')                   | Ref. Genome | Fragment size (bp)                      | Genomic coordinates                                                 |
| <i>proximal<br/>GPR101<br/>promoter</i>                                                                                                                            | TCGACCATATGGGAGGGGCCATGGGAAAAAGATGTAGAG | ATCCAACGCGTTGGGGGCAACAGCCAGAGGGCG        | hg19        | 1,300                                   | chrX:136113819-<br>136115148                                        |
| <i>distal<br/>GPR101<br/>promoter</i>                                                                                                                              | TCGACCATATGGGAGATTTCCCTTGTGCCCTGCC      | ATCCAACGCGTTGGGCTGTTGCTGCTGCAGACG        | hg19        | 1,146                                   | chrX:136115961-<br>136117106                                        |
| <i>eARHGEF6-<br/>intronic</i>                                                                                                                                      | CGATCTAAGTAAGCTTCATGACCGACTGGTCTCTGAAA  | CCAGCAAACGAAGCTTTAAGCATTTTTTTAAAAAAGGAAT | hg19        | 4,811                                   | chrX:135846959-<br>135851769                                        |
| <i>eVGLL1-<br/>intronic</i>                                                                                                                                        | TCTTACGCGTGCTAGCTCATGGTGAACACTAATGCAGGC | GATCGCAGATCTCGAGTGGGGAACACAGGATGCC       | hg19        | 1,357                                   | chrX:135632564-<br>135633920                                        |

Cloning primer sequences for functional evaluation of CREs.

**Table S3. TAD maps in BED format for human tissues and cell types retrieved from the 3D Genome Browser**

| Abbreviation               | Data file from 3D Genome Browser            | Cellular context                     | Original Citation | GEO accession number |
|----------------------------|---------------------------------------------|--------------------------------------|-------------------|----------------------|
| H1-ESC_Dixon2015           | H1-ESC_Dixon2015-raw_TADs.txt               | Embryonic stem cells                 | 2                 | GSE52457             |
| H1-TRO_Dixon2015           | H1-TRO_Dixon2015-raw_TADs.txt               | Trophoblast-like cells               | 2                 | GSE52457             |
| H1-MSC_Dixon2015           | H1-MSC_Dixon2015-raw_TADs.txt               | Mesenchymal stem cells               | 2                 | GSE52457             |
| H1-NPC_Dixon2015           | H1-NPC_Dixon2015-raw_TADs.txt               | Neural progenitor cells              | 2                 | GSE52457             |
| H1-MES_Dixon2015           | H1-MES_Dixon2015-raw_TADs.txt               | Mesendoderm cells                    | 2                 | GSE52457             |
| AdrenalGland_Schmitt2016   | AdrenalGland_Donor-AD2-raw_TADs.txt         | Adrenal Gland (primary tissue)       | 16                | GSE87112             |
| VentricleRight_Schmitt2016 | VentricleRight_Donor-RV3-raw_TADs.txt       | Right Ventricle (primary tissue)     | 16                | GSE87112             |
| Bladder_Schmitt2016        | Bladder_Donor-BL1-raw_TADs.txt              | Bladder (primary tissue)             | 16                | GSE87112             |
| Cortex_Schmitt2016         | Cortex_DLPFC_Donor-CO-raw_TADs.txt          | Prefrontal Cortex (primary tissue)   | 16                | GSE87112             |
| Bowel_Schmitt2016          | Bowel_Small_Donor-SB2-raw_TADs.txt          | Small bowel (primary tissue)         | 16                | GSE87112             |
| Lung_Schmitt2016           | Lung_Donor-LG1-raw_TADs.txt                 | Lung (primary tissue)                | 16                | GSE87112             |
| Muscle_Schmitt2016         | Muscle_Psoas_Donor-PO1-raw_TADs.txt         | Psoas Muscle (primary tissue)        | 16                | GSE87112             |
| Pancreas_Schmitt2016       | Pancreas_Donor-PA2-raw_TADs.txt             | Pancreas (primary tissue)            | 16                | GSE87112             |
| Spleen_Schmitt2016         | Spleen_Donor-PX1-raw_TADs.txt               | Spleen (primary tissue)              | 16                | GSE87112             |
| Aorta_Leung2015            | Aorta_STL002_Leung2015-raw_TADs.txt         | Aorta (primary tissue)               | 17                | GSE58752             |
| VentricleLeft_Leung2015    | VentricleLeft_STL003_Leung2015-raw_TADs.txt | Left ventricle (primary tissue)      | 17                | GSE58752             |
| Thymus_Leung2015           | Thymus_STL001_Leung2015-raw_TADs.txt        | Thymus (primary tissue)              | 17                | GSE58752             |
| HMEC_Rao2014               | HMEC_Lieberman-raw_TADs.txt                 | Human Mammary Epithelial Cells       | 18                | GSE63525             |
| IMR90_Rao2014              | IMR90_Lieberman-raw_TADs.txt                | Foetal lung fibroblast               | 18                | GSE63525             |
| NHEK_Rao2014               | NHEK_Lieberman-raw_TADs.txt                 | Normal Human Epidermal Keratinocytes | 18                | GSE63525             |
| GM12878_Rao2014            | GM12878_Rao_2014-raw_TADs.txt               | Transformed lymphoblastoid cells     | 18                | GSE63525             |
| HUVEC_Rao2014              | HUVEC_Lieberman-raw_TADs.txt                | Umbilical vein endothelial cells     | 18                | GSE63525             |

**Table S4. List of differentially expressed genes**

**Table S5. Mean raw gene counts at the X-LAG locus**

| <b>Annotation</b> | <b>Mean (logCPM)<br/>Normal Pituitary</b> | <b>Mean (logCPM)<br/>X-LAG</b> |
|-------------------|-------------------------------------------|--------------------------------|
| <i>GPR112</i>     | -1.585844278                              | -1.487361093                   |
| <i>BRS3</i>       | -1.183253634                              | -0.424866166                   |
| <i>HTATSF1</i>    | 8.980024092                               | 9.833832722                    |
| <i>VGLL1</i>      | -0.263426474                              | 0.420912497                    |
| <i>MIR934</i>     | -4.187293202                              | -3.65754158                    |
| <i>LINC00892</i>  | -3.417444506                              | -2.186648854                   |
| <i>CD40LG</i>     | -2.068764489                              | -0.860794746                   |
| <i>ARHGEF6</i>    | 4.58984749                                | 5.231740189                    |
| <i>RBMX</i>       | 6.883316259                               | 7.787668371                    |
| <i>SNORD61</i>    | -1.439633306                              | -0.873762095                   |
| <i>GPR101</i>     | -3.260984837                              | 7.927241678                    |
| <i>ZIC3</i>       | 0.336778929                               | 0.27451518                     |

Both genes found duplicated in at least one X-LAG individual and neighboring genes never duplicated in X-LAG (*GPR112* and *ZIC3*) are reported.

**Table S6. Gene fusion analysis**

## Supplemental Materials and Methods

### **Fusion gene analysis**

The fusion gene analysis was performed on the total RNA-seq data described in the main text Materials and Methods. Following QC assessment and read trimming steps, fusion gene analysis was performed using the TopHat tool and the TopHat-fusion-post function.<sup>19</sup> The annotated results were manually inspected for any fusion of *GPR101* with any other gene. Since no mate was detected, no threshold for fusion score was required.

## Supplemental References

1. Wang, Y., Song, F., Zhang, B., Zhang, L., Xu, J., Kuang, D., Li, D., Choudhary, M.N.K., Li, Y., Hu, M., et al. (2018). The 3D Genome Browser: a web-based browser for visualizing 3D genome organization and long-range chromatin interactions. *Genome Biol* 19, 151.
2. Dixon, J.R., Jung, I., Selvaraj, S., Shen, Y., Antosiewicz-Bourget, J.E., Lee, A.Y., Ye, Z., Kim, A., Rajagopal, N., Xie, W., et al. (2015). Chromatin architecture reorganization during stem cell differentiation. *Nature* 518, 331-336.
3. Bonev, B., Mendelson Cohen, N., Szabo, Q., Fritsch, L., Papadopoulos, G.L., Lubling, Y., Xu, X., Lv, X., Hugnot, J.P., Tanay, A., et al. (2017). Multiscale 3D Genome Rewiring during Mouse Neural Development. *Cell* 171, 557-572 e524.
4. GTEx Consortium (2020). The GTEx Consortium atlas of genetic regulatory effects across human tissues. *Science* 369, 1318-1330.
5. Trivellin, G., and Stratakis, C.A. (2019). CD40LG duplications in patients with X-LAG syndrome commonly undergo random X-chromosome inactivation. *J Allergy Clin Immunol* 143, 1659.
6. Liang, H., Gong, F., Liu, Z., Yang, Y., Yao, Y., Wang, R., Wang, L., Chen, M., Pan, H., and Zhu, H. (2020). A Chinese case of X-linked acrogigantism and systemic review. *Neuroendocrinology*.
7. Trarbach, E.B., Trivellin, G., Grande, I.P.P., Duarte, F.H.G., Jorge, A.A.L., do Nascimento, F.B.P., Garmes, H.M., Nery, M., Mendonca, B.B., Stratakis, C.A., et al. (2021). Genetics, clinical features and outcomes of non-syndromic pituitary gigantism: experience of a single center from Sao Paulo, Brazil. *Pituitary* 24, 252-261.
8. Trivellin, G., Bjelobaba, I., Daly, A.F., Larco, D.O., Palmeira, L., Faucz, F.R., Thiry, A., Leal, L.F., Rostomyan, L., Quezado, M., et al. (2016). Characterization of GPR101 transcript structure and expression patterns. *J Mol Endocrinol* 57, 97-111.
9. FANTOM Consortium and the RIKEN PMI and CLST (DGT), Forrest, A.R., Kawaji, H., Rehli, M., Baillie, J.K., de Hoon, M.J., Haberle, V., Lassmann, T., et al. (2014). A promoter-level mammalian expression atlas. *Nature* 507, 462-470.

10. Savitsky, P., Krojer, T., Fujisawa, T., Lambert, J.P., Picaud, S., Wang, C.Y., Shanle, E.K., Krajewski, K., Friedrichsen, H., Kanapin, A., et al. (2016). Multivalent Histone and DNA Engagement by a PHD/BRD/PWWP Triple Reader Cassette Recruits ZMYND8 to K14ac-Rich Chromatin. *Cell Rep* 17, 2724-2737.
11. Vermunt, M.W., Reinink, P., Korving, J., de Bruijn, E., Creyghton, P.M., Basak, O., Geeven, G., Toonen, P.W., Lansu, N., Meunier, C., et al. (2014). Large-scale identification of coregulated enhancer networks in the adult human brain. *Cell Rep* 9, 767-779.
12. ENCODE Project Consortium (2012). An integrated encyclopedia of DNA elements in the human genome. *Nature* 489, 57-74.
13. Mayran, A., Khetchoumian, K., Hariri, F., Pastinen, T., Gauthier, Y., Balsalobre, A., and Drouin, J. (2018). Pioneer factor Pax7 deploys a stable enhancer repertoire for specification of cell fate. *Nat Genet* 50, 259-269.
14. Beckers, A., Lodish, M.B., Trivellin, G., Rostomyan, L., Lee, M., Faucz, F.R., Yuan, B., Choong, C.S., Caberg, J.H., Verrua, E., et al. (2015). X-linked acrogigantism syndrome: clinical profile and therapeutic responses. *Endocr Relat Cancer* 22, 353-367.
15. Trivellin, G., Daly, A.F., Faucz, F.R., Yuan, B., Rostomyan, L., Larco, D.O., Scherthaner-Reiter, M.H., Szarek, E., Leal, L.F., Caberg, J.H., et al. (2014). Gigantism and acromegaly due to Xq26 microduplications and GPR101 mutation. *N Engl J Med* 371, 2363-2374.
16. Schmitt, A.D., Hu, M., Jung, I., Xu, Z., Qiu, Y., Tan, C.L., Li, Y., Lin, S., Lin, Y., Barr, C.L., et al. (2016). A Compendium of Chromatin Contact Maps Reveals Spatially Active Regions in the Human Genome. *Cell Rep* 17, 2042-2059.
17. Leung, D., Jung, I., Rajagopal, N., Schmitt, A., Selvaraj, S., Lee, A.Y., Yen, C.A., Lin, S., Lin, Y., Qiu, Y., et al. (2015). Integrative analysis of haplotype-resolved epigenomes across human tissues. *Nature* 518, 350-354.
18. Rao, S.S., Huntley, M.H., Durand, N.C., Stamenova, E.K., Bochkov, I.D., Robinson, J.T., Sanborn, A.L., Machol, I., Omer, A.D., Lander, E.S., et al. (2014). A 3D map of the human genome at kilobase resolution reveals principles of chromatin looping. *Cell* 159, 1665-1680.



19. Kim, D., and Salzberg, S.L. (2011). TopHat-Fusion: an algorithm for discovery of novel fusion transcripts. *Genome Biol* 12, R72.
